# Supplementary material for: Measuring Psychosocial Reactions to COVID-19: The COVID Reaction Scales (COVID-RS) as a New Assessment Tool
Source: PubMed Central journal article supplement (PMC7718022; doi:10.3389/fpsyg.2020.607064), 2020-11-19
Supplement: Data_Sheet_1.pdf [file Data_Sheet_1.pdf]

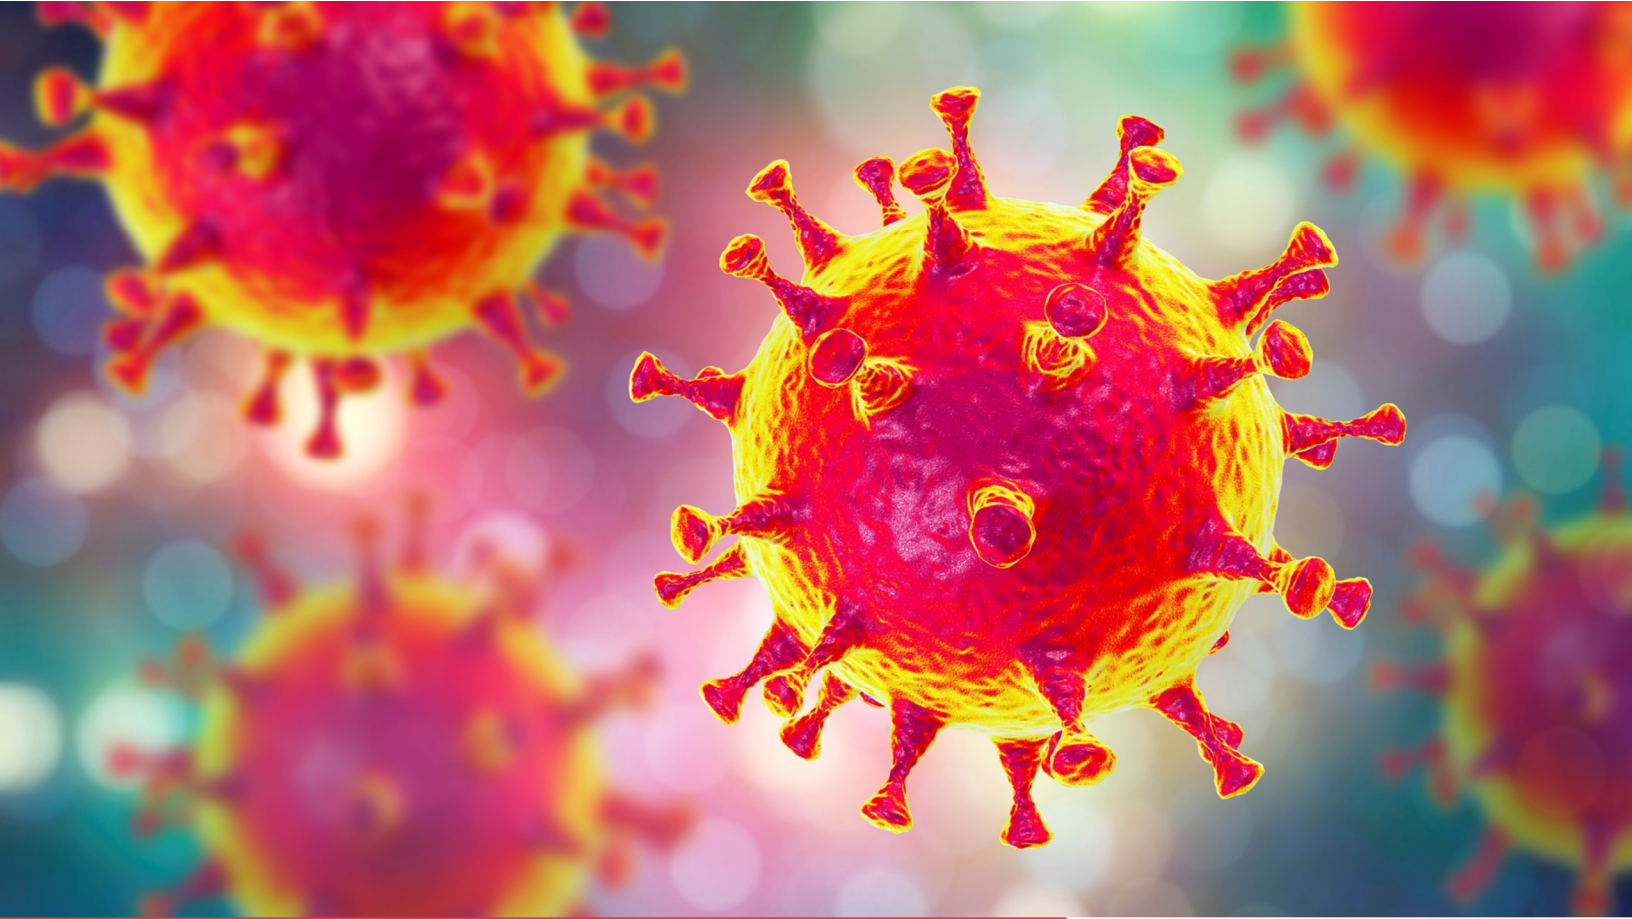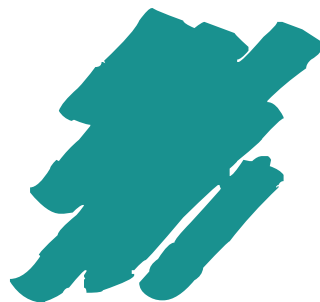

# COVID-RS

COVID REACTION SCALES

ESCALAS DE REACCIÓN A LA COVID

ÁLEX ESCOLÀ-GASCÓN  
FRANCESC-XAVIER MARÍN  
JORDI RUSIÑOL  
JOSEP GALLIFA

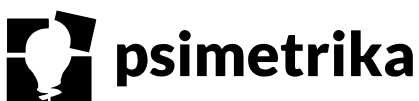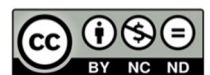

REACCIONES CONDUCTUALES DESADAPTATIVAS AL CORONAVIRUS

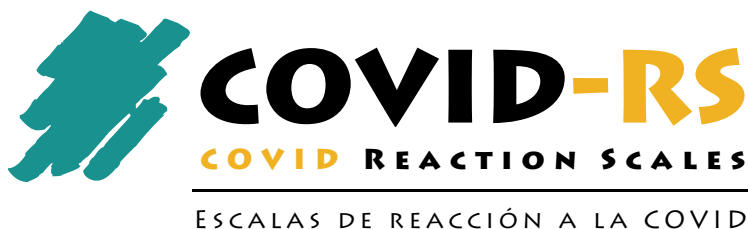Localidad  Fecha de hoy  /  / Sexo:  Hombre  Mujer Antecedentes psiquiátricos:  Sí  NoNivel educativo:  Educación Primaria  Educación Secundaria Obligatoria (ESO) Formación Profesional  Bachillerato o Módulos Superiores Estudios universitarios, máster o doctorados¿Padeció o padece Vd. la enfermedad COVID-19?  Sí  No  No lo sé

## INSTRUCCIONES

Este cuestionario trata sobre sus experiencias y maneras de reaccionar ante la crisis del coronavirus y su impacto socio-sanitario. A continuación, encontrará 31 frases que expresan opiniones y situaciones relacionadas con el coronavirus y la COVID-19. En cada enunciado, debe señalar su grado de acuerdo mediante una escala gradual del 0 al 4. El 0 significa «completamente en desacuerdo» y el 4 «completamente de acuerdo». Este cuestionario no tiene respuestas correctas o incorrectas. Por lo tanto, sea sincero y no responda según lo que se espere de Vd. No piense mucho sus respuestas, cuando dude qué debe contestar señale su primera impresión. Responda a todas las preguntas. Muchas gracias por su colaboración.

### PUEDA COMENZAR LA PRUEBA

|    |                                                                                                  | 0                     | 1                     | 2                     | 3                     | 4                     |
|----|--------------------------------------------------------------------------------------------------|-----------------------|-----------------------|-----------------------|-----------------------|-----------------------|
| 1  | El gobierno y las autoridades no nos dicen la verdad sobre los peligros del coronavirus.         | <input type="radio"/> | <input type="radio"/> | <input type="radio"/> | <input type="radio"/> | <input type="radio"/> |
| 2  | Tengo mucho miedo de contagiarme de coronavirus.                                                 | <input type="radio"/> | <input type="radio"/> | <input type="radio"/> | <input type="radio"/> | <input type="radio"/> |
| 3  | El coronavirus es una creación de los laboratorios, gobiernos o de las grandes organizaciones.   | <input type="radio"/> | <input type="radio"/> | <input type="radio"/> | <input type="radio"/> | <input type="radio"/> |
| 4  | Aunque tomo las precauciones sanitarias recomendadas, no me siento seguro/a saliendo a la calle. | <input type="radio"/> | <input type="radio"/> | <input type="radio"/> | <input type="radio"/> | <input type="radio"/> |
| 5  | El coronavirus es una enfermedad que “mata” más de lo que nos dicen.                             | <input type="radio"/> | <input type="radio"/> | <input type="radio"/> | <input type="radio"/> | <input type="radio"/> |
| 6  | Creo que el coronavirus forma parte de alguna conspiración.                                      | <input type="radio"/> | <input type="radio"/> | <input type="radio"/> | <input type="radio"/> | <input type="radio"/> |
| 7  | Me siento incómodo/a cuando alguien “tose” por la calle y está cerca de mí.                      | <input type="radio"/> | <input type="radio"/> | <input type="radio"/> | <input type="radio"/> | <input type="radio"/> |
| 8  | Me pongo nervioso/a cuando veo a gente sin mascarilla por la calle.                              | <input type="radio"/> | <input type="radio"/> | <input type="radio"/> | <input type="radio"/> | <input type="radio"/> |
| 9  | El coronavirus fue “soltado” expresamente para acabar con una parte de la población mundial.     | <input type="radio"/> | <input type="radio"/> | <input type="radio"/> | <input type="radio"/> | <input type="radio"/> |
| 10 | El coronavirus generará una nueva “guerra” entre países.                                         | <input type="radio"/> | <input type="radio"/> | <input type="radio"/> | <input type="radio"/> | <input type="radio"/> |
| 11 | Por muchas precauciones que tome, me siento constantemente desprotegido/a.                       | <input type="radio"/> | <input type="radio"/> | <input type="radio"/> | <input type="radio"/> | <input type="radio"/> |
| 12 | Siento ansiedad si no me desinfecto o no me lavo las manos de forma habitual.                    | <input type="radio"/> | <input type="radio"/> | <input type="radio"/> | <input type="radio"/> | <input type="radio"/> |

CONTINÚE EN LA PÁGINA SIGUIENTE

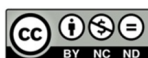

**0 1 2 3 4**

|           |                                                                                  |                       |                       |                       |                       |                       |
|-----------|----------------------------------------------------------------------------------|-----------------------|-----------------------|-----------------------|-----------------------|-----------------------|
| <b>13</b> | Me siento ansioso/a cuando la gente no mantiene las distancias sociales.         | <input type="radio"/> | <input type="radio"/> | <input type="radio"/> | <input type="radio"/> | <input type="radio"/> |
| <b>14</b> | El coronavirus puede curarse con remedios naturales y alternativos a la ciencia. | <input type="radio"/> | <input type="radio"/> | <input type="radio"/> | <input type="radio"/> | <input type="radio"/> |
| <b>15</b> | Creo que toda la población contraerá la enfermedad del coronavirus.              | <input type="radio"/> | <input type="radio"/> | <input type="radio"/> | <input type="radio"/> | <input type="radio"/> |

## DURANTE LOS PERIODOS DE CUARENTENA SOCIAL...

*Conteste solamente sobre lo que hizo durante los confinamientos realizados.*

**0 1 2 3 4**

|           |                                                                                                                                                  |                       |                       |                       |                       |                       |
|-----------|--------------------------------------------------------------------------------------------------------------------------------------------------|-----------------------|-----------------------|-----------------------|-----------------------|-----------------------|
| <b>16</b> | He sentido ansiedad cada vez que leía, escuchaba o miraba las noticias que trataban sobre el coronavirus.                                        | <input type="radio"/> | <input type="radio"/> | <input type="radio"/> | <input type="radio"/> | <input type="radio"/> |
| <b>17</b> | He comprado más cantidad de comida de lo habitual.                                                                                               | <input type="radio"/> | <input type="radio"/> | <input type="radio"/> | <input type="radio"/> | <input type="radio"/> |
| <b>18</b> | En algún momento he creído que los supermercados estaban desabastecidos.                                                                         | <input type="radio"/> | <input type="radio"/> | <input type="radio"/> | <input type="radio"/> | <input type="radio"/> |
| <b>19</b> | Me he sentido saturado por la cantidad de información que he recibido sobre el coronavirus.                                                      | <input type="radio"/> | <input type="radio"/> | <input type="radio"/> | <input type="radio"/> | <input type="radio"/> |
| <b>20</b> | He comprado productos que no necesitaba.                                                                                                         | <input type="radio"/> | <input type="radio"/> | <input type="radio"/> | <input type="radio"/> | <input type="radio"/> |
| <b>21</b> | He invertido mucho tiempo consultando noticias sobre el coronavirus.                                                                             | <input type="radio"/> | <input type="radio"/> | <input type="radio"/> | <input type="radio"/> | <input type="radio"/> |
| <b>22</b> | Me he auto-medicado para prevenir el contagio (sin prescripción médica).                                                                         | <input type="radio"/> | <input type="radio"/> | <input type="radio"/> | <input type="radio"/> | <input type="radio"/> |
| <b>23</b> | He comprado más papel higiénico del que necesitaba (en esta pregunta también se pueden incluir "el rollo de cocina" y las servilletas de papel). | <input type="radio"/> | <input type="radio"/> | <input type="radio"/> | <input type="radio"/> | <input type="radio"/> |
| <b>24</b> | He sentido impulsos por comprar productos alimentarios cuando no los necesitaba.                                                                 | <input type="radio"/> | <input type="radio"/> | <input type="radio"/> | <input type="radio"/> | <input type="radio"/> |
| <b>25</b> | No he parado de leer, escuchar o ver las noticias que hablaban sobre el coronavirus.                                                             | <input type="radio"/> | <input type="radio"/> | <input type="radio"/> | <input type="radio"/> | <input type="radio"/> |
| <b>26</b> | Cuando he consultado noticias sobre el coronavirus he sentido "terror".                                                                          | <input type="radio"/> | <input type="radio"/> | <input type="radio"/> | <input type="radio"/> | <input type="radio"/> |
| <b>27</b> | Me he sentido estresado por la información que los medios de comunicación transmitieron sobre el coronavirus.                                    | <input type="radio"/> | <input type="radio"/> | <input type="radio"/> | <input type="radio"/> | <input type="radio"/> |
| <b>28</b> | Me hubiera gustado hacer planes de ocio con otras personas.                                                                                      | <input type="radio"/> | <input type="radio"/> | <input type="radio"/> | <input type="radio"/> | <input type="radio"/> |
| <b>29</b> | He extrañado tener gente a mí alrededor.                                                                                                         | <input type="radio"/> | <input type="radio"/> | <input type="radio"/> | <input type="radio"/> | <input type="radio"/> |
| <b>30</b> | Me he sentido distanciado de mis amistades y/o familiares.                                                                                       | <input type="radio"/> | <input type="radio"/> | <input type="radio"/> | <input type="radio"/> | <input type="radio"/> |
| <b>31</b> | He añorado verme físicamente con mis amigos y/o familiares.                                                                                      | <input type="radio"/> | <input type="radio"/> | <input type="radio"/> | <input type="radio"/> | <input type="radio"/> |
